# Supplementary material for: GTSP1 expression in non-smoker and non-drinker patients with squamous cell carcinoma of the head and neck
Source: PubMed Central journal article supplement (PMC5560606; doi:10.1371/journal.pone.0182600), 2017-08-17
Supplement: pone.0182600.s001.pdf [file pone.0182600.s001.pdf]

**S1 Table. Analysis of the association of HPV in matched patients NSND and SD**

| NSND     | SD              |                 | p*    |
|----------|-----------------|-----------------|-------|
|          | HPV<br>negative | HPV<br>positive |       |
| negative | 24 (92.3%)      | 2 (7.7%)        | 0.180 |
| positive | 7(100%)         | 0               |       |

\*McNemar, NSND: non-smokers and non-drinkers; SD: smokers and drinkers; HPV: human papillomavirus
