# Supplementary material for: GTSP1 expression in non-smoker and non-drinker patients with squamous cell carcinoma of the head and neck
Source: PubMed Central journal article supplement (PMC5560606; doi:10.1371/journal.pone.0182600), 2017-08-17
Supplement: pone.0182600.s002.pdf [file pone.0182600.s002.pdf]

**S2 Table. Analysis of the association of HPV according to the expression of GSTPI in the margin of NSND patients**

|                 |                 | <b>GSTPI margin</b> |             | <b>p<sup>‡</sup></b> |
|-----------------|-----------------|---------------------|-------------|----------------------|
| <b>NSND</b>     | <b>HPV</b>      | <b>low</b>          | <b>high</b> | <b>1</b>             |
|                 | <b>negative</b> | 10 (62.5%)          | 6 (37.5%)   |                      |
| <b>positive</b> | 3 (60%)         | 2 (40%)             |             |                      |

<sup>‡</sup>Fisher's exact test NSND: non-smokers and non-drinkers; HPV: human papillomavirus
