# Supplementary material for: GTSP1 expression in non-smoker and non-drinker patients with squamous cell carcinoma of the head and neck
Source: PubMed Central journal article supplement (PMC5560606; doi:10.1371/journal.pone.0182600), 2017-08-17
Supplement: pone.0182600.s003.pdf [file pone.0182600.s003.pdf]

**S3 Table. Analysis of the association of HPV according to the expression of GSTPI in the tumor of NSND patients**

|             |                     | <b>GSTPI tumor</b> |             | <b>p<sup>‡</sup></b> |
|-------------|---------------------|--------------------|-------------|----------------------|
|             |                     | <b>low</b>         | <b>high</b> |                      |
| <b>NSND</b> | <b>HPV negative</b> | 1 (4%)             | 24 (96.0%)  | 0.355                |
|             | <b>HPV positive</b> | 1 (16.7%)          | 5 (83.3%)   |                      |

<sup>‡</sup>Fisher's exact test NSND: non-smokers and non-drinkers; HPV: human papillomavirus
