# Supplementary material for: GTSP1 expression in non-smoker and non-drinker patients with squamous cell carcinoma of the head and neck
Source: PubMed Central journal article supplement (PMC5560606; doi:10.1371/journal.pone.0182600), 2017-08-17
Supplement: pone.0182600.s004.pdf [file pone.0182600.s004.pdf]

**S4 Table. Analysis of the association of HPV according to the expression of GSTPI in the margin of SD patients**

|    |              | GSTPI margin |          | p <sup>‡</sup> |
|----|--------------|--------------|----------|----------------|
|    |              | low          | high     |                |
| SD | HPV negative | 4 (20%)      | 16 (80%) | 1              |
|    | HPV positive | 0            | 1 (100%) |                |

<sup>‡</sup>Fisher's exact test SD: smokers and drinkers; HPV: human papillomavirus
