# Supplementary material for: GTSP1 expression in non-smoker and non-drinker patients with squamous cell carcinoma of the head and neck
Source: PubMed Central journal article supplement (PMC5560606; doi:10.1371/journal.pone.0182600), 2017-08-17
Supplement: pone.0182600.s005.pdf [file pone.0182600.s005.pdf]

**S5 Table. Analysis of the association of HPV according to the expression of GSTPI in the tumor of SD patients**

|    |                 | GSTPI tumor |           | p <sup>‡</sup> |
|----|-----------------|-------------|-----------|----------------|
|    |                 | low         | high      |                |
| SD | HPV<br>negative | 0           | 20 (100%) | x              |
|    | HPV<br>positive | 1           | 0         |                |

<sup>‡</sup>Fisher's exact test SD: smokers and drinkers; HPV: human papillomavirus
