# Supplementary material for: GTSP1 expression in non-smoker and non-drinker patients with squamous cell carcinoma of the head and neck
Source: PubMed Central journal article supplement (PMC5560606; doi:10.1371/journal.pone.0182600), 2017-08-17
Supplement: pone.0182600.s006.pdf [file pone.0182600.s006.pdf]

| id1 | id2 | hab1     | hab2 | sex1 | sex2 | age1 | age2 | Ethnicity1 |
|-----|-----|----------|------|------|------|------|------|------------|
|     | 6   | 47 NSND  | SD   |      | 2    | 2    | 71   | 70 White   |
|     | 7   | 46 NSND  | SD   |      | 1    | 1    | 73   | 75 Mulatto |
|     | 8   | 99 NSND  | SD   |      | 1    | 1    | 71   | 75 White   |
|     | 9   | 1 NSND   | SD   |      | 1    | 1    | 70   | 70 White   |
|     | 14  | 18 NSND  | SD   |      | 2    | 2    | 56   | 56 White   |
|     | 15  | 48 NSND  | SD   |      | 1    | 1    | 61   | 59 Black   |
|     | 17  | 25 NSND  | SD   |      | 2    | 2    | 76   | 80 White   |
|     | 19  | 73 NSND  | SD   |      | 2    | 2    | 71   | 70 White   |
|     | 21  | 87 NSND  | SD   |      | 2    | 2    | 39   | 42 White   |
|     | 26  | 4 NSND   | SD   |      | 1    | 1    | 40   | 39 White   |
|     | 27  | 38 NSND  | SD   |      | 1    | 2    | 54   | 56 White   |
|     | 28  | 53 NSND  | SD   |      | 1    | 1    | 35   | 39 White   |
|     | 30  | 86 NSND  | SD   |      | 1    | 1    | 57   | 61 White   |
|     | 32  | 89 NSND  | SD   |      | 2    | 2    | 50   | 53 White   |
|     | 34  | 33 NSND  | SD   |      | 2    | 2    | 73   | 70 White   |
|     | 36  | 79 NSND  | SD   |      | 1    | 1    | 42   | 39 White   |
|     | 37  | 59 NSND  | SD   |      | 1    | 1    | 63   | 63 White   |
|     | 40  | 83 NSND  | SD   |      | 1    | 1    | 58   | 57 Black   |
|     | 41  | 76 NSND  | SD   |      | 1    | 1    | 73   | 70 White   |
|     | 44  | 77 NSND  | SD   |      | 1    | 1    | 51   | 50 White   |
|     | 50  | 77 NSND  | SD   |      | 1    | 1    | 51   | 50 White   |
|     | 51  | 81 NSND  | SD   |      | 2    | 2    | 69   | 66 White   |
|     | 52  | 3 NSND   | SD   |      | 1    | 1    | 55   | 54 Black   |
|     | 54  | 33 NSND  | SD   |      | 2    | 2    | 66   | 70 White   |
|     | 55  | 22 NSND  | SD   |      | 2    | 2    | 63   | 63 White   |
|     | 56  | 107 NSND | SD   |      | 1    | 1    | 58   | 61 White   |
|     | 58  | 76 NSND  | SD   |      | 1    | 1    | 66   | 70 White   |
|     | 62  | 2 NSND   | SD   |      | 1    | 1    | 65   | 68 Asian   |
|     | 63  | 61 NSND  | SD   |      | 1    | 1    | 81   | 79 White   |
|     | 65  | 64 NSND  | SD   |      | 2    | 2    | 36   | 41 99      |
|     | 68  | 61 NSND  | SD   |      | 1    | 1    | 77   | 79 White   |
|     | 72  | 16 NSND  | SD   |      | 1    | 1    | 69   | 71 White   |
|     | 75  | 29 NSND  | SD   |      | 1    | 1    | 65   | 68 White   |
|     | 78  | 76 NSND  | SD   |      | 1    | 1    | 70   | 70 White   |
|     | 88  | 23 NSND  | SD   |      | 2    | 2    | 52   | 51 White   |
|     | 90  | 61 NSND  | SD   |      | 1    | 1    | 79   | 79 White   |
|     | 91  | 61 NSND  | SD   |      | 1    | 1    | 80   | 79 Asian   |
|     | 92  | 29 NSND  | SD   |      | 1    | 1    | 66   | 68 White   |
|     | 93  | 61 NSND  | SD   |      | 1    | 1    | 83   | 79 White   |
|     | 94  | 12 NSND  | SD   |      | 2    | 2    | 56   | 53 White   |
|     | 95  | 1 NSND   | SD   |      | 1    | 1    | 74   | 70 White   |
|     | 96  | 67 NSND  | SD   |      | 2    | 2    | 52   | 50 Asian   |
|     | 97  | 46 NSND  | SD   |      | 1    | 1    | 74   | 75 White   |
|     | 103 | 84 NSND  | SD   |      | 2    | 2    | 52   | 51 White   |
|     | 104 | 23 NSND  | SD   |      | 2    | 2    | 53   | 51 Mulatto |
|     | 106 | 1 NSND   | SD   |      | 1    | 1    | 72   | 70 White   |
|     | 109 | 31 NSND  | SD   |      | 2    | 2    | 74   | 69 White   |

| Ethnicity2 | t1 | t2 | n1 | n2 | site1 | site2 | tumor varia | tumor varia |   |
|------------|----|----|----|----|-------|-------|-------------|-------------|---|
| White      |    | 4  | 4  | 1  | 1     | 5     | 5           | 1           | 1 |
| White      |    | 2  | 2  | 1  | 1     | 1     | 1           | 1           | 1 |
| White      |    | 2  | 2  | 0  | 0     | 1     | 1           | 3           | 2 |
| White      |    | 3  | 4  | 0  | 0     | 1     | 1           | 1           | 2 |
| White      |    | 4  | 4  | 1  | 1     | 2     | 2           | 1           | 1 |
| White      |    | 1  | 1  | 0  | 0     | 1     | 1           | 1           | 1 |
| White      |    | 4  | 4  | 0  | 0     | 4     | 4           | 1           | 1 |
| White      |    | 2  | 2  | 0  | 0     | 1     | 1           | 1           | 1 |
| Black      |    | 4  | 4  | 0  | 0     | 4     | 4           | 1           | 1 |
| Mulatto    |    | 3  | 4  | 1  | 1     | 1     | 1           | 1           | 1 |
| Mulatto    |    | 4  | 4  | 1  | 1     | 1     | 1           | 1           | 1 |
| White      |    | 1  | 1  | 0  | 0     | 1     | 1           | 1           | 1 |
| Mulatto    |    | 4  | 3  | 0  | 0     | 1     | 1           | 1           | 1 |
| White      |    | 2  | 2  | 0  | 0     | 3     | 3           | 1           | 1 |
| White      |    | 1  | 1  | 0  | 0     | 4     | 4           | 1           | 1 |
| Mulatto    |    | 1  | 1  | 0  | 0     | 1     | 1           | 1           | 1 |
| White      |    | 2  | 3  | 0  | 0     | 4     | 4           |             | 1 |
| White      |    | 2  | 1  | 0  | 0     | 1     | 1           | 1           | 1 |
| Black      |    | 2  | 2  | 0  | 0     | 1     | 1           | 1           | 1 |
| Mulatto    |    | 2  | 1  | 1  | 1     | 1     | 1           | 1           | 1 |
| Mulatto    |    | 2  | 1  | 1  | 1     | 1     | 1           | 1           | 1 |
| White      |    | 1  | 1  | 1  | 1     | 1     | 1           | 1           | 1 |
| Mulatto    |    | 4  | 3  | 0  | 0     | 4     | 4           | 1           | 1 |
| White      |    | 1  | 1  | 0  | 0     | 4     | 4           | 1           | 1 |
| Mulatto    |    | 3  | 3  | 1  | 1     | 1     | 1           | 1           | 1 |
| White      |    | 1  | 2  | 0  | 0     | 4     | 4           | 1           |   |
| Black      |    | 2  | 2  | 0  | 0     | 1     | 1           | 1           | 1 |
| Mulatto    |    | 4  | 4  | 0  | 0     | 1     | 1           | 1           | 1 |
| White      |    | 2  | 1  | 0  | 0     | 1     | 1           | 1           | 1 |
| White      |    | 1  | 1  | 0  | 0     | 1     | 1           | 1           | 1 |
| White      |    | 2  | 1  | 0  | 0     | 1     | 1           | 1           | 1 |
| Mulatto    |    | 1  | 1  | 0  | 0     | 1     | 1           | 1           | 1 |
| White      |    | 3  | 4  | 1  | 1     | 1     | 1           | 1           | 1 |
| Black      |    | 2  | 2  | 0  | 0     | 1     | 1           | 1           | 1 |
| White      |    | 4  | 4  | 1  | 1     | 4     | 4           | 1           | 1 |
| White      |    | 2  | 1  | 0  | 0     | 1     | 1           | 1           | 1 |
| White      |    | 1  | 1  | 0  | 0     | 1     | 1           | 1           | 1 |
| White      |    | 4  | 4  | 1  | 1     | 1     | 1           | 1           | 1 |
| White      |    | 2  | 1  | 0  | 0     | 1     | 1           | 1           | 1 |
| Mulatto    |    | 3  | 4  | 1  | 1     | 2     | 2           | 1           | 1 |
| White      |    | 4  | 4  | 0  | 0     | 1     | 1           | 1           | 2 |
| White      |    | 4  | 4  | 1  | 1     | 4     | 4           | 1           | 1 |
| White      |    | 2  | 2  | 1  | 1     | 1     | 1           | 1           | 1 |
| Black      |    | 2  | 2  | 1  | 1     | 1     | 1           |             | 1 |
| White      |    | 4  | 4  | 1  | 1     | 4     | 4           |             | 1 |
| White      |    | 2  | 4  | 0  | 0     | 1     | 1           |             | 2 |
| White      |    | 3  | 4  | 1  | 1     | 1     | 1           |             | 1 |

| grade1 | grade2 | hpv1 | hpv2 | pair1 | pair2 | GSTPi_marginNSND |
|--------|--------|------|------|-------|-------|------------------|
| 1      | 2      | 0    | 0    | 1     | 1     | 99               |
| 1      | 2      | 0    | 0    | 2     | 2     | 0                |
| 1      | 1      |      |      | 3     | 3     | 99               |
| 1      | 2      | 0    | 0    | 4     | 4     | 0                |
| 1      | 1      | 0    | 0    | 5     | 5     | 1                |
| 2      | 2      | 1    | 0    | 6     | 6     | 0                |
| 1      | 1      |      | 0    | 7     | 7     | 99               |
| 2      | 2      | 1    | 0    | 8     | 8     | 99               |
| 1      | 2      |      | 0    | 9     | 9     | 99               |
| 1      | 2      | 1    | 0    | 10    | 10    | 1                |
| 1      | 1      | 1    | 0    | 11    | 11    | 99               |
|        | 1      |      | 0    | 12    | 12    | 99               |
| 2      | 2      | 0    | 1    | 13    | 13    | 99               |
| 2      | 2      | 0    | 0    | 14    | 14    | 0                |
| 1      | 1      | 0    | 0    | 15    | 15    | 99               |
| 2      | 2      | 0    | 0    | 16    | 16    | 1                |
| 1      | 1      | 0    | 0    | 17    | 17    | 99               |
| 1      | 1      | 0    | 0    | 18    | 18    | 99               |
| 2      | 1      |      | 0    | 19    | 19    | 99               |
| 2      | 2      | 0    | 0    | 20    | 20    | 0                |
| 1      | 2      | 0    | 0    | 21    | 21    | 0                |
| 2      | 1      | 0    | 1    | 22    | 22    | 0                |
| 2      | 2      | 1    |      | 23    | 23    | 99               |
| 1      | 1      | 0    | 0    | 24    | 24    | 99               |
| 2      | 2      | 0    | 0    | 25    | 25    | 99               |
|        | 2      | 1    |      | 26    | 26    | 99               |
| 1      | 1      | 0    | 0    | 27    | 27    | 0                |
| 2      | 2      | 1    | 0    | 28    | 28    | 0                |
| 1      | 1      | 1    | 0    | 29    | 29    | 0                |
| 1      | 2      | 0    | 0    | 30    | 30    | 99               |
| 1      | 1      | 1    | 0    | 31    | 31    | 1                |
| 1      | 1      | 0    | 0    | 32    | 32    | 0                |
| 1      | 2      | 0    |      | 33    | 33    | 1                |
| 2      | 1      | 0    | 0    | 34    | 34    | 1                |
| 1      | 1      | 0    | 0    | 35    | 35    | 99               |
| 1      | 1      | 0    | 0    | 36    | 36    | 0                |
| 1      | 1      | 0    | 0    | 37    | 37    | 1                |
| 1      | 2      | 1    |      | 38    | 38    | 99               |
| 2      | 1      | 0    | 0    | 39    | 39    | 1                |
| 1      | 2      | 0    | 0    | 40    | 40    | 99               |
| 2      | 2      | 0    | 0    | 41    | 41    | 0                |
| 3      | 3      | 1    |      | 42    | 42    | 99               |
| 2      | 2      | 0    | 0    | 43    | 43    | 99               |
| 2      | 2      |      | 0    | 44    | 44    | 99               |
| 1      | 1      |      | 0    | 45    | 45    | 99               |
| 1      | 2      |      | 0    | 46    | 46    | 99               |
| 1      | 1      |      | 0    | 47    | 47    | 99               |

| GSTPi_marginSD | GSTPi_tumorNSND | GSTPi_tumorSD |
|----------------|-----------------|---------------|
| 99             | 1               | 1             |
| 0              | 1               | 1             |
| 99             | 99              | 99            |
| 1              | 1               | 1             |
| 1              | 1               | 1             |
| 99             | 0               | 1             |
| 1              | 1               | 1             |
| 1              | 99              | 0             |
| 99             | 1               | 1             |
| 99             | 1               | 0             |
| 0              | 1               | 1             |
| 0              | 99              | 99            |
| 1              | 0               | 1             |
| 99             | 1               | 99            |
| 1              | 1               | 1             |
| 1              | 1               | 1             |
| 1              | 1               | 1             |
| 1              | 1               | 1             |
| 1              | 1               | 1             |
| 1              | 99              | 1             |
| 1              | 1               | 1             |
| 1              | 1               | 1             |
| 99             | 1               | 1             |
| 99             | 99              | 99            |
| 1              | 1               | 1             |
| 0              | 1               | 1             |
| 99             | 99              | 99            |
| 1              | 1               | 1             |
| 1              | 1               | 1             |
| 1              | 1               | 1             |
| 99             | 1               | 99            |
| 1              | 1               | 1             |
| 1              | 1               | 1             |
| 99             | 1               | 99            |
| 1              | 1               | 1             |
| 1              | 1               | 1             |
| 1              | 1               | 1             |
| 99             | 99              | 99            |
| 1              | 1               | 1             |
| 1              | 1               | 1             |
| 1              | 1               | 1             |
| 99             | 99              | 99            |
| 0              | 99              | 1             |
| 0              | 99              | 1             |
| 0              | 99              | 1             |
| 1              | 99              | 1             |
| 1              | 99              | 1             |
