# Supplementary material for: GTSP1 expression in non-smoker and non-drinker patients with squamous cell carcinoma of the head and neck
Source: PubMed Central journal article supplement (PMC5560606; doi:10.1371/journal.pone.0182600), 2017-08-17
Supplement: pone.0182600.s007.pdf [file pone.0182600.s007.pdf]

| ID  | hab1 | age1 | t1 | n1 | site1 | variant1 | grade1 | pair1 | time_days | GSTPi_marginNSND | GSTPi_tumorNSND |
|-----|------|------|----|----|-------|----------|--------|-------|-----------|------------------|-----------------|
| 6   | NSND | 71   | 4  | 1  | 5     | 1        | 1      | 1     | 239       | 99               | 1               |
| 7   | NSND | 73   | 2  | 1  | 1     | 1        | 1      | 2     | 1783      | 0                | 1               |
| 8   | NSND | 71   | 2  | 0  | 1     | 3        | 1      | 3     | 317       | 99               | 99              |
| 9   | NSND | 70   | 3  | 0  | 1     | 1        | 1      | 4     | 597       | 0                | 1               |
| 14  | NSND | 56   | 4  | 1  | 2     | 1        | 1      | 5     | 748       | 1                | 1               |
| 15  | NSND | 61   | 1  | 0  | 1     | 1        | 2      | 6     | 1522      | 0                | 0               |
| 17  | NSND | 76   | 4  | 0  | 4     | 1        | 1      | 7     | 1372      | 99               | 1               |
| 19  | NSND | 71   | 2  | 0  | 1     | 1        | 2      | 8     | 1         | 99               | 99              |
| 21  | NSND | 39   | 4  | 0  | 4     | 1        | 1      | 9     | 794       | 99               | 1               |
| 26  | NSND | 40   | 3  | 1  | 1     | 1        | 1      | 10    | 257       | 1                | 1               |
| 27  | NSND | 54   | 4  | 1  | 1     | 1        | 1      | 11    | 149       | 99               | 1               |
| 28  | NSND | 35   | 1  | 0  | 1     | 1        |        | 12    | 2275      | 99               | 99              |
| 30  | NSND | 57   | 4  | 0  | 1     | 1        | 2      | 13    | 1847      | 99               | 0               |
| 32  | NSND | 50   | 2  | 0  | 3     | 1        | 2      | 14    | 1714      | 0                | 1               |
| 34  | NSND | 73   | 1  | 0  | 4     | 1        | 1      | 15    | 508       | 99               | 1               |
| 36  | NSND | 42   | 1  | 0  | 1     | 1        | 2      | 16    | 1524      | 1                | 1               |
| 37  | NSND | 63   | 2  | 0  | 4     |          | 1      | 17    | 1474      | 99               | 1               |
| 40  | NSND | 58   | 2  | 0  | 1     | 1        | 1      | 18    | 764       | 99               | 1               |
| 41  | NSND | 73   | 2  | 0  | 1     | 1        | 2      | 19    | 1092      | 99               | 99              |
| 44  | NSND | 51   | 2  | 1  | 1     | 1        | 2      | 20    | 2826      | 0                | 1               |
| 50  | NSND | 51   | 2  | 1  | 1     | 1        | 1      | 21    | 318       | 0                | 1               |
| 51  | NSND | 69   | 1  | 1  | 1     | 1        | 2      | 22    | 221       | 0                | 1               |
| 52  | NSND | 55   | 4  | 0  | 4     | 1        | 2      | 23    | 2389      | 99               | 99              |
| 54  | NSND | 66   | 1  | 0  | 4     | 1        | 1      | 24    | 2186      | 99               | 1               |
| 55  | NSND | 63   | 3  | 1  | 1     | 1        | 2      | 25    | 368       | 99               | 1               |
| 56  | NSND | 58   | 1  | 0  | 4     | 1        |        | 26    | 2248      | 99               | 99              |
| 58  | NSND | 66   | 2  | 0  | 1     | 1        | 1      | 27    | 2174      | 0                | 1               |
| 62  | NSND | 65   | 4  | 0  | 1     | 1        | 2      | 28    | 1977      | 0                | 1               |
| 63  | NSND | 81   | 2  | 0  | 1     | 1        | 1      | 29    | 925       | 0                | 1               |
| 65  | NSND | 36   | 1  | 0  | 1     | 1        | 1      | 30    | 1755      | 99               | 1               |
| 68  | NSND | 77   | 2  | 0  | 1     | 1        | 1      | 31    | 1406      | 1                | 1               |
| 72  | NSND | 69   | 1  | 0  | 1     | 1        | 1      | 32    | 1315      | 0                | 1               |
| 75  | NSND | 65   | 3  | 1  | 1     | 1        | 1      | 33    | 176       | 1                | 1               |
| 78  | NSND | 70   | 2  | 0  | 1     | 1        | 2      | 34    | 617       | 1                | 1               |
| 88  | NSND | 52   | 4  | 1  | 4     | 1        | 1      | 35    | 361       | 99               | 99              |
| 90  | NSND | 79   | 2  | 0  | 1     | 1        | 1      | 36    | 853       | 0                | 1               |
| 91  | NSND | 80   | 1  | 0  | 1     | 1        | 1      | 37    | 540       | 1                | 1               |
| 92  | NSND | 66   | 4  | 1  | 1     | 1        | 1      | 38    | 499       | 99               | 99              |
| 93  | NSND | 83   | 2  | 0  | 1     | 1        | 2      | 39    | 346       | 1                | 1               |
| 94  | NSND | 56   | 3  | 1  | 2     | 1        | 1      | 40    | 92        | 99               | 1               |
| 95  | NSND | 74   | 4  | 0  | 1     | 1        | 2      | 41    | 439       | 0                | 1               |
| 96  | NSND | 52   | 4  | 1  | 4     | 1        | 3      | 42    | 439       | 99               | 99              |
| 97  | NSND | 74   | 2  | 1  | 1     | 1        | 2      | 43    | 95        | 99               | 99              |
| 103 | NSND | 52   | 2  | 1  | 1     |          | 2      | 44    | 268       | 99               | 99              |
| 104 | NSND | 53   | 4  | 1  | 4     |          | 1      | 45    | 1313      | 99               | 99              |
| 106 | NSND | 72   | 2  | 0  | 1     |          | 1      | 46    | 371       | 99               | 99              |
| 109 | NSND | 74   | 3  | 1  | 1     |          | 1      | 47    | 342       | 99               | 99              |

|          |    |   |   |   |   |   |      |    |    |
|----------|----|---|---|---|---|---|------|----|----|
| 5 NSND   | 70 | 2 | 1 | 3 | 1 | 2 | 1970 | 1  | 1  |
| 10 NSND  | 81 | 4 | 0 | 1 | 1 | 1 | 1270 | 1  | 0  |
| 11 NSND  | 79 | 3 | 0 | 1 | 1 | 2 | 1249 | 1  | 1  |
| 13 NSND  | 85 | 4 | 0 | 1 | 1 | 2 | 1638 | 1  | 1  |
| 20 NSND  | 79 | 4 | 1 | 1 | 1 | 1 | 163  | 0  | 1  |
| 24 NSND  | 41 | 1 | 1 | 1 | 1 | 3 | 1918 | 99 | 99 |
| 35 NSND  | 75 | 4 | 1 | 1 | 1 | 1 | 911  | 0  | 1  |
| 39 NSND  | 80 | 4 | 0 | 1 | 1 | 2 | 443  | 99 | 1  |
| 42 NSND  | 25 | 2 | 1 | 1 | 1 | 2 | 2465 | 1  | 1  |
| 43 NSND  | 21 | 0 | 1 | 3 | 1 | 1 | 172  | 99 | 99 |
| 45 NSND  | 38 | 1 | 0 | 3 | 1 | 1 | 2784 | 0  | 1  |
| 49 NSND  | 93 | 4 | 0 | 1 | 1 | 1 | 5    | 0  | 1  |
| 57 NSND  | 75 | 3 | 0 | 2 | 3 |   | 2233 | 99 | 1  |
| 60 NSND  | 48 | 1 | 0 | 3 | 1 | 1 | 1980 | 1  | 1  |
| 66 NSND  | 49 | 1 | 0 | 3 | 1 | 2 | 395  | 0  | 1  |
| 69 NSND  | 55 | 3 | 0 | 1 | 1 | 1 | 1487 | 0  | 1  |
| 70 NSND  | 86 | 2 | 0 | 1 | 1 | 2 | 12   | 99 | 99 |
| 71 NSND  | 62 | 2 | 1 | 1 | 1 | 2 | 1610 | 0  | 1  |
| 74 NSND  | 29 | 2 | 1 | 2 | 1 | 3 | 1426 | 1  | 1  |
| 80 NSND  | 72 |   | 1 | 3 | 1 | 2 | 307  | 99 | 99 |
| 82 NSND  | 81 | 2 | 1 | 1 | 1 | 2 | 272  | 1  | 1  |
| 85 NSND  | 28 | 2 | 1 | 3 | 1 | 2 | 1113 | 0  | 1  |
| 98 NSND  | 68 | 2 | 0 | 3 | 4 | 1 | 1    | 0  | 1  |
| 100 NSND | 56 | 1 | 1 | 2 |   | 3 | 2532 | 1  | 1  |
| 101 NSND | 92 | 2 | 0 | 3 |   | 1 |      | 0  | 1  |
| 102 NSND | 27 | 1 | 0 | 1 |   | 2 |      | 1  | 1  |
| 105 NSND | 63 | 4 | 1 | 1 |   | 3 | 138  | 99 | 99 |
| 108 NSND | 64 | 4 | 0 | 2 |   | 1 | 1847 | 99 | 99 |
| 110 NSND | 58 |   |   | 4 | 2 |   | 1104 | 1  | 1  |
